# Supplementary material for: Re-entrant structural phase transition in a frustrated kagome magnet, Rb2SnCu3F12
Source: Royal Society of Chemistry journal article supplement (doi:10.1039/c3ce41422a), 2013-01-01
Supplement: c3ce41422a.pdf [file c3ce41422a.pdf]

# Re-entrant Structural Phase Transition in a Frustrated Kagome Magnet, $\text{Rb}_2\text{SnCu}_3\text{F}_{12}$

## Electronic Supporting Information

Lewis J. Downie<sup>a</sup>, Stephen P. Thompson<sup>b</sup>, Chiu C. Tang<sup>b</sup>, Simon Parsons<sup>c</sup> and Philip Lightfoot<sup>\*d</sup>

### Synchrotron X-ray Powder Diffraction

All synchrotron X-ray powder diffraction was performed at Diamond Light Source, Ltd., Harwell Science and Innovation Campus, Didcot, Oxfordshire, OX11 0DE, UK. Beam-line I11 (High-resolution powder diffraction)<sup>1</sup> was used with monochromatic X-rays of either  $\lambda = 0.826128 \text{ \AA}$  (Run 1) or  $\lambda = 0.827168 \text{ \AA}$  (Run 2). These values (as well as zero point errors) were derived before each group of runs using a silicon standard. The temperature of the sample environment was controlled using an Oxford Cryosystem 700+ cryostream. The rate of temperature change was at a maximum of  $10 \text{ }^\circ\text{C min}^{-1}$  with a minimum 5 minute equilibration time except in cases where the system was precooled and the sample cooled quickly. In such cases the minimum equilibration time was 20 minutes. A typical room temperature fit is shown in Fig. S1.

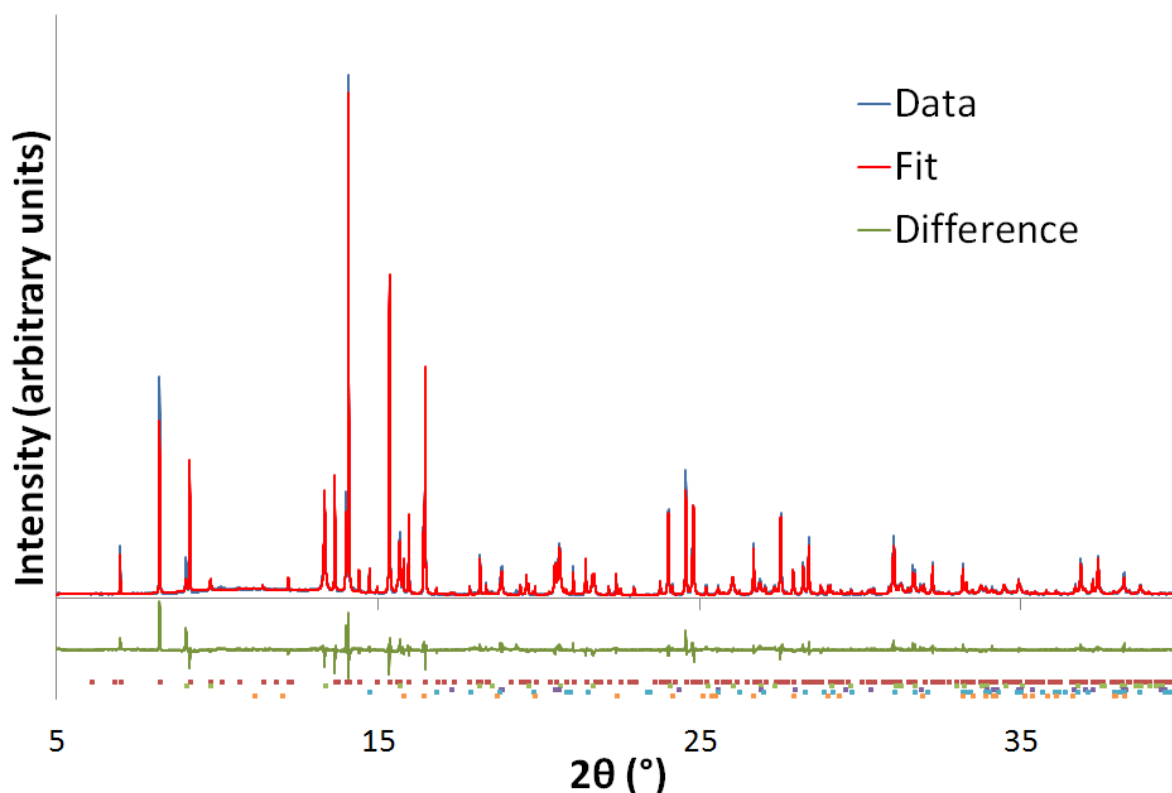

Fig S1: Rietveld fit at 300 K (tick marks: red =  $\text{Rb}_2\text{SnCu}_3\text{F}_{12}$ , green =  $\text{Rb}_2\text{SnF}_6$ , purple =  $\text{CuO}$ , blue =  $\text{CuF}_2$ , orange =  $\text{RbCuF}_3$ )

The fit is found to be good at all temperatures despite the relative complexity of the sample. The refinement takes into account five separate phases given in Table S1.

Table S1: The phases used in the Rietveld refinement and their refined weight percentages.

| Phase                                                     | Weight percentage |
|-----------------------------------------------------------|-------------------|
| $\text{Rb}_2\text{SnCu}_3\text{F}_{12}$ ('Rhomb-2' phase) | 71.9 (4)          |
| $\text{Rb}_2\text{SnF}_6$                                 | 19.6 (7)          |
| $\text{CuO}$                                              | 2.9 (3)           |
| $\text{CuF}_2$                                            | 2.0 (5)           |
| $\text{RbCuF}_3$                                          | 3.7 (5)           |

Lattice parameters, background, relative proportions of phases, and profiles were refined. The coordinates of the atoms in each phase were not refined but the thermal parameters were constrained by atom type or, for the less abundant phases,

constrained to be the same for the entire phase. In the case of the phase of interest the starting models in Table S2 were used – the triclinic model was derived using ISODISTORT<sup>2</sup> with the transformation matrix  $\{(2/3,1/3,1/3),(-1/3,1/3,1/3),(-1/3,-2/3,1/3)\}$ .

**Table S2:** Atomic coordinates ( $\times 10^4$ ), equivalent isotropic displacement parameters ( $\text{\AA}^2 \times 10^3$ ), and site occupancies for starting models.

| Rhombohedral <sup>3</sup> ( <i>R</i> -3) |          |          |          |                        |       | Triclinic <sup>2</sup> ( <i>P</i> -1) |          |          |          |                        |       |
|------------------------------------------|----------|----------|----------|------------------------|-------|---------------------------------------|----------|----------|----------|------------------------|-------|
| Atom                                     | <i>x</i> | <i>y</i> | <i>z</i> | <i>U</i> <sub>eq</sub> | Occ.  | Atom                                  | <i>x</i> | <i>y</i> | <i>z</i> | <i>U</i> <sub>eq</sub> | Occ.  |
| Rb (1)                                   | 6667     | 3333     | -647     | 25                     | 1     | Rb (1)                                | 3999     | 8933     | 8991     | 25                     | 1     |
| Rb (2)                                   | 3358     | 1650     | 641      | 25                     | 1     | Rb (2)                                | 8991     | 3999     | 8933     | 25                     | 1     |
| Cu (1)                                   | 5946     | 1665     | 1682     | 25                     | 1     | Rb (3)                                | 8933     | 8991     | 3999     | 25                     | 1     |
| Cu (2)                                   | 3516     | -723     | 1769     | 25                     | 1     | Rb (4)                                | 6020     | 6020     | 6020     | 25                     | 1     |
| Sn (1)                                   | 5000     | 0        | 0        | 25                     | 1     | Cu (1)                                | 7628     | 7401     | 17       | 25                     | 1     |
| Sn (2)                                   | 6667     | 3333     | 3333     | 25                     | 1     | Cu (2)                                | 17       | 7628     | 7401     | 25                     | 1     |
| F (1)                                    | 6495     | 651      | 1700     | 25                     | 1     | Cu (3)                                | 7401     | 17       | 7928     | 25                     | 1     |
| F (2)                                    | 7409     | 2773     | 1439     | 25                     | 1     | Cu (4)                                | 5285     | 7530     | 2492     | 25                     | 1     |
| F (3)                                    | 4581     | 693      | 2105     | 25                     | 1     | Cu (5)                                | 2492     | 5285     | 7530     | 25                     | 1     |
| F (4)                                    | 7853     | 4443     | 2780     | 25                     | 1     | Cu (6)                                | 7530     | 2492     | 5285     | 25                     | 1     |
| F (5)                                    | 4464     | 872      | -460     | 25                     | 1     | Sn (1)                                | 5000     | 5000     | 0        | 25                     | 1     |
| F (6A)                                   | 4501     | 310      | 835      | 25                     | 0.773 | Sn (2)                                | 0        | 5000     | 5000     | 25                     | 1     |
| F (7A)                                   | 6389     | 1378     | 95       | 25                     | 0.773 | Sn (3)                                | 5000     | 0        | 5000     | 25                     | 1     |
| F (6B)                                   | 3861     | -250     | 629      | 25                     | 0.227 | Sn (4)                                | 0        | 0        | 0        | 25                     | 1     |
| F (7B)                                   | 6066     | 1320     | 470      | 25                     | 0.227 | F (1)                                 | 8195     | 5856     | 1049     | 25                     | 1     |
| F (8)                                    | 2465     | -2156    | 1462     | 25                     | 1     | F (2)                                 | 1049     | 8195     | 5856     | 25                     | 1     |
|                                          |          |          |          |                        |       | F (3)                                 | 5856     | 1049     | 8195     | 25                     | 1     |
|                                          |          |          |          |                        |       | F (4)                                 | 8848     | 6803     | 8666     | 25                     | 1     |
|                                          |          |          |          |                        |       | F (5)                                 | 8666     | 8848     | 6803     | 25                     | 1     |
|                                          |          |          |          |                        |       | F (6)                                 | 6803     | 8666     | 8848     | 25                     | 1     |
|                                          |          |          |          |                        |       | F (7)                                 | 6686     | 8217     | 1412     | 25                     | 1     |
|                                          |          |          |          |                        |       | F (8)                                 | 1412     | 6686     | 8217     | 25                     | 1     |
|                                          |          |          |          |                        |       | F (9)                                 | 8217     | 1412     | 6686     | 25                     | 1     |
|                                          |          |          |          |                        |       | F (10)                                | 633      | 9370     | 8337     | 25                     | 1     |
|                                          |          |          |          |                        |       | F (11)                                | 8337     | 633      | 9370     | 25                     | 1     |
|                                          |          |          |          |                        |       | F (12)                                | 9370     | 8337     | 633      | 25                     | 1     |
|                                          |          |          |          |                        |       | F (13)                                | 4004     | 5948     | 8668     | 25                     | 1     |
|                                          |          |          |          |                        |       | F (14)                                | 8668     | 4004     | 5948     | 25                     | 1     |
|                                          |          |          |          |                        |       | F (15)                                | 5948     | 8668     | 4004     | 25                     | 1     |
|                                          |          |          |          |                        |       | F (16A1)                              | 5336     | 6644     | 525      | 25                     | 0.773 |
|                                          |          |          |          |                        |       | F (16A2)                              | 525      | 5336     | 6644     | 25                     | 0.773 |
|                                          |          |          |          |                        |       | F (16A3)                              | 6644     | 525      | 5336     | 25                     | 0.773 |
|                                          |          |          |          |                        |       | F (17A1)                              | 6484     | 5084     | 8717     | 25                     | 0.773 |
|                                          |          |          |          |                        |       | F (17A2)                              | 8717     | 6484     | 5084     | 25                     | 0.773 |
|                                          |          |          |          |                        |       | F (17A3)                              | 5084     | 8717     | 6484     | 25                     | 0.773 |
|                                          |          |          |          |                        |       | F (16B1)                              | 4490     | 6518     | 879      | 25                     | 0.227 |
|                                          |          |          |          |                        |       | F (16B2)                              | 879      | 4490     | 6518     | 25                     | 0.227 |
|                                          |          |          |          |                        |       | F (16B3)                              | 6518     | 879      | 4490     | 25                     | 0.227 |
|                                          |          |          |          |                        |       | F (17B1)                              | 6536     | 5724     | 9150     | 25                     | 0.227 |
|                                          |          |          |          |                        |       | F (17B2)                              | 9150     | 6536     | 5724     | 25                     | 0.227 |
|                                          |          |          |          |                        |       | F (17B3)                              | 5724     | 9150     | 6536     | 25                     | 0.227 |
|                                          |          |          |          |                        |       | F (18)                                | 3928     | 6842     | 3619     | 25                     | 1     |
|                                          |          |          |          |                        |       | F (19)                                | 3619     | 3928     | 6842     | 25                     | 1     |
|                                          |          |          |          |                        |       | F (20)                                | 6842     | 3619     | 3928     | 25                     | 1     |

All refinements were performed using GSAS<sup>4</sup> with the EXPGUI interface<sup>5</sup>. Lattice parameters at all temperatures can be found in Tables S3, S4 and S5. Note that a mixed phase model (rhombohedral plus triclinic) provided the best fit at temperatures 160 - 225 K and 255 - 300 K. Outside these ranges only minor improvements in fit were observed by including the two phases.

**Table S3:** Lattice parameters for Rb<sub>2</sub>SnCu<sub>3</sub>F<sub>12</sub> during run 1 (heating).

| Temperature<br>(wRp %) | Phase<br>(% wt. if mix)            | a            | b            | c            | $\alpha$    | $\beta$     | $\gamma$    |
|------------------------|------------------------------------|--------------|--------------|--------------|-------------|-------------|-------------|
| 500 K<br>(13.44 %)     | Rhombohedral                       | 13.94808(7)  |              | 20.53955(14) |             |             |             |
|                        | Rhombohedral<br>(Triclinic equiv.) | 10.56998     | 10.56998     | 10.56998     | 82.56879    | 82.56879    | 82.56879    |
| 490 K<br>(14.36 %)     | Rhombohedral                       | 13.94602(7)  |              | 20.52875(14) |             |             |             |
|                        | Rhombohedral<br>(Triclinic equiv.) | 10.56674     | 10.56674     | 10.56674     | 82.58475    | 82.58475    | 82.58475    |
| 460 K<br>(14.34 %)     | Rhombohedral                       | 13.93994(7)  |              | 20.49858(14) |             |             |             |
|                        | Rhombohedral<br>(Triclinic equiv.) | 10.55755     | 10.55755     | 10.55755     | 82.62842    | 82.62842    | 82.62842    |
| 430 K<br>(15.27 %)     | Rhombohedral                       | 13.93154(9)  |              | 20.47108(15) |             |             |             |
|                        | Rhombohedral<br>(Triclinic equiv.) | 10.54793     | 10.54793     | 10.54793     | 82.65962    | 82.65962    | 82.65962    |
| 400 K<br>(15.47 %)     | Rhombohedral                       | 13.92397(9)  |              | 20.44383(15) |             |             |             |
|                        | Rhombohedral<br>(Triclinic equiv.) | 10.53872     | 10.53872     | 10.53872     | 82.69287    | 82.69287    | 82.69287    |
| 370 K<br>(15.66 %)     | Rhombohedral                       | 13.91702(7)  |              | 20.41946(15) |             |             |             |
|                        | Rhombohedral<br>(Triclinic equiv.) | 10.53040     | 10.53040     | 10.53040     | 82.72210    | 82.72210    | 82.72210    |
| 340 K<br>(15.76 %)     | Rhombohedral                       | 13.90999(6)  |              | 20.38810(14) |             |             |             |
|                        | Rhombohedral<br>(Triclinic equiv.) | 10.52055     | 10.52055     | 10.52055     | 82.76558    | 82.76558    | 82.76558    |
| 310 K<br>(15.63 %)     | Rhombohedral                       | 13.90367(7)  |              | 20.35529(2)  |             |             |             |
|                        | Rhombohedral<br>(Triclinic equiv.) | 10.51070     | 10.51070     | 10.51070     | 82.81428    | 82.81428    | 82.81428    |
| 280 K<br>(16.56 %)     | Rhombohedral<br><b>(60.8 %)</b>    | 13.89777(7)  |              | 20.3240(2)   |             |             |             |
|                        | Rhombohedral<br>(Triclinic equiv.) | 10.50137     | 10.50137     | 10.50137     | 82.86117    | 82.86117    | 82.86117    |
|                        | Triclinic<br><b>(39.2 %)</b>       | 10.5026(3)   | 10.4888(2)   | 10.5136(3)   | 82.808(2)   | 83.0201(15) | 82.7436(19) |
| 250 K<br>(17.55 %)     | Triclinic                          | 10.49567(13) | 10.47100(10) | 10.50961(12) | 82.7888(10) | 83.1582(7)  | 82.7769(10) |
| 220 K<br>(17.39 %)     | Rhombohedral<br><b>(21.2 %)</b>    | 13.8833(7)   |              | 20.2814(18)  |             |             |             |
|                        | Rhombohedral<br>(Triclinic equiv.) | 10.48583     | 10.48583     | 10.48583     | 82.90563    | 82.90563    | 82.90563    |
|                        | Triclinic<br><b>(78.8 %)</b>       | 10.48901(11) | 10.45747(10) | 10.50346(11) | 82.7510(9)  | 83.2737(8)  | 82.8137(9)  |
| 190 K<br>(14.56 %)     | Rhombohedral<br><b>(91.3 %)</b>    | 13.87539(7)  |              | 20.24422(17) |             |             |             |

|                    |                                    |             |            |              |           |           |           |
|--------------------|------------------------------------|-------------|------------|--------------|-----------|-----------|-----------|
|                    | Rhombohedral<br>(Triclinic equiv.) | 10.47435    | 10.47435   | 10.47435     | 82.95884  | 82.95884  | 82.95884  |
|                    | Triclinic<br><b>(8.7 %)</b>        | 10.4838(6)  | 10.4535(6) | 10.4973(6)   | 82.676(4) | 83.375(4) | 82.806(5) |
| 160 K<br>(14.68 %) | Rhombohedral                       | 13.86987(7) |            | 20.21940(15) |           |           |           |
|                    | Rhombohedral<br>(Triclinic equiv.) | 10.46658    | 10.46658   | 10.46658     | 82.99369  | 82.99369  | 82.99369  |
| 130 K<br>(14.59 %) | Rhombohedral                       | 13.86500(7) |            | 20.19567(15) |           |           |           |
|                    | Rhombohedral<br>(Triclinic equiv.) | 10.45934    | 10.45934   | 10.45934     | 83.02828  | 83.02828  | 83.02828  |
| 100 K<br>(14.97 %) | Rhombohedral                       | 13.86107(7) |            | 20.17396(16) |           |           |           |
|                    | Rhombohedral<br>(Triclinic equiv.) | 10.45294    | 10.45294   | 10.45294     | 83.06155  | 83.06155  | 83.06155  |

**Table S4:** Lattice parameters for  $\text{Rb}_2\text{SnCu}_3\text{F}_{12}$  during run 2 (heating).

| Temperature<br>(wRp %) | Phase<br>(% wt. if mix)            | a            | b            | c            | $\alpha$    | $\beta$     | $\gamma$    |
|------------------------|------------------------------------|--------------|--------------|--------------|-------------|-------------|-------------|
| 300 K<br>(10.17 %)     | Rhombohedral                       | 13.90136(4)  |              | 20.34751(8)  |             |             |             |
|                        | Rhombohedral<br>(Triclinic equiv.) | 10.50801     | 10.50801     | 10.50801     | 82.82338    | 82.82338    | 82.82338    |
| 270 K<br>(10.06 %)     | Rhombohedral<br><b>(43.5 %)</b>    | 13.89573(6)  |              | 20.3199(3)   |             |             |             |
|                        | Rhombohedral<br>(Triclinic equiv.) | 10.49959     | 10.49959     | 10.49959     | 82.86349    | 82.86349    | 82.86349    |
|                        | Triclinic<br><b>(56.5 %)</b>       | 10.51158(16) | 10.48354(11) | 10.50333(19) | 82.7775(17) | 83.0485(9)  | 82.7769(16) |
| 255 K<br>(11.58 %)     | Triclinic                          | 10.50784(12) | 10.47446(8)  | 10.49813(12) | 82.7813(11) | 83.1232(5)  | 82.7788(11) |
| 240 K<br>(10.74 %)     | Triclinic                          | 10.50599(10) | 10.46618(7)  | 10.49444(10) | 82.7960(9)  | 83.1932(5)  | 82.7640(9)  |
| 225 K<br>(10.92 %)     | Rhombohedral<br><b>(7.8 %)</b>     | 13.8968(2)   |              | 20.2692(11)  |             |             |             |
|                        | Rhombohedral<br>(Triclinic equiv.) | 10.48917     | 10.48917     | 10.48917     | 82.97182    | 82.97182    | 82.97182    |
|                        | Triclinic<br><b>(92.2 %)</b>       | 10.50331(10) | 10.45844(8)  | 10.49072(11) | 82.8111(9)  | 83.2582(6)  | 82.7587(9)  |
| 210 K<br>(10.86 %)     | Rhombohedral<br><b>(63.1 %)</b>    | 13.87922(9)  |              | 20.2554(3)   |             |             |             |
|                        | Rhombohedral<br>(Triclinic equiv.) | 10.47844     | 10.47844     | 10.47844     | 82.97423    | 82.97423    | 82.97423    |
|                        | Triclinic<br><b>(36.9 %)</b>       | 10.49948(19) | 10.45565(17) | 10.4861(2)   | 82.8171(18) | 83.2928(12) | 82.7512(16) |
| 195 K                  | Rhombohedral                       | 13.87647(5)  |              | 20.24273(10) |             |             |             |

|                    |                                    |             |          |             |          |          |          |
|--------------------|------------------------------------|-------------|----------|-------------|----------|----------|----------|
| (10.57 %)          | Rhombohedral<br>(Triclinic equiv.) | 10.47451    | 10.47451 | 10.47451    | 82.96521 | 82.96521 | 82.96521 |
| 180 K<br>(10.52 %) | Rhombohedral                       | 13.87529(4) |          | 20.23096(9) |          |          |          |
|                    | Rhombohedral<br>(Triclinic equiv.) | 10.47146    | 10.47146 | 10.47146    | 82.98608 | 82.98608 | 82.98608 |

**Table S5:** Lattice parameters for Rb<sub>2</sub>SnCu<sub>3</sub>F<sub>12</sub> during run 2 (cooling).

| Temperature<br>(wRp %) | Phase<br>(% wt. if mix)            | a            | b            | c            | $\alpha$    | $\beta$     | $\gamma$     |
|------------------------|------------------------------------|--------------|--------------|--------------|-------------|-------------|--------------|
| 300 K<br>(9.51 %)      | Rhombohedral                       | 13.90182(3)  |              | 20.34270(7)  |             |             |              |
|                        | Rhombohedral<br>(Triclinic equiv.) | 10.50715(3)  | 10.50715(3)  | 10.50715(3)  | 82.8347(2)  | 82.8347(2)  | 82.8347(2)   |
| 285 K<br>(10.99 %)     | Rhombohedral                       | 13.89795(4)  |              | 20.33113(9)  |             |             |              |
|                        | Rhombohedral<br>(Triclinic equiv.) | 10.50298(4)  | 10.50298(4)  | 10.50298(4)  | 82.8470(3)  | 82.8470(3)  | 82.8470(3)   |
| 270 K<br>(9.88 %)      | Rhombohedral<br><b>(63.6 %)</b>    | 13.89442(4)  |              | 20.31730(12) |             |             |              |
|                        | Rhombohedral<br>(Triclinic equiv.) | 10.49846(5)  | 10.49846(5)  | 10.49846(5)  | 82.8649(4)  | 82.8649(4)  | 82.8649(4)   |
|                        | Triclinic<br><b>(36.4 %)</b>       | 10.5104(3)   | 10.5030(4)   | 10.4829(2)   | 82.770(3)   | 82.774(3)   | 83.0398(14)  |
| 255 K<br>(10.68 %)     | Rhombohedral<br><b>(38.3 %)</b>    | 13.89168(12) |              | 20.3053(4)   |             |             |              |
|                        | Rhombohedral<br>(Triclinic equiv.) | 10.49466(14) | 10.49466(14) | 10.49466(14) | 82.8814(12) | 82.8814(12) | 82.8814(12)  |
|                        | Triclinic<br><b>(61.7 %)</b>       | 10.49834(15) | 10.47361(10) | 10.50877(13) | 82.7739(12) | 83.1284(8)  | 82.77772(13) |
| 240 K<br>(12.58 %)     | Triclinic                          | 10.49595(18) | 10.46988(9)  | 10.50484(17) | 82.7866(17) | 83.1624(7)  | 82.7865(16)  |
| 225 K<br>(11.60 %)     | Triclinic                          | 10.49236(14) | 10.46205(8)  | 10.50251(13) | 82.7638(12) | 83.2292(6)  | 82.8099(12)  |
| 210 K<br>(11.55 %)     | Rhombohedral<br><b>(12.1 %)</b>    | 13.8793(3)   |              | 20.2582(8)   |             |             |              |
|                        | Rhombohedral<br>(Triclinic equiv.) | 10.4791(3)   | 10.4791(3)   | 10.4791(3)   | 82.942(3)   | 82.942(3)   | 82.942(3)    |
|                        | Triclinic<br><b>(87.9 %)</b>       | 10.49897(13) | 10.45388(10) | 10.48708(14) | 82.8243(12) | 83.2972(7)  | 82.7588(11)  |
| 195 K<br>(10.24 %)     | Rhombohedral<br><b>(80.2 %)</b>    | 13.87635(6)  |              | 20.24240(16) |             |             |              |
|                        | Rhombohedral<br>(Triclinic equiv.) | 10.47438(6)  | 10.47438(6)  | 10.47438(6)  | 82.9655(5)  | 82.9655(5)  | 82.9655(5)   |
|                        | Triclinic<br><b>(19.8 %)</b>       | 10.4959(3)   | 10.4533(3)   | 10.4829(4)   | 82.826(3)   | 83.316(2)   | 82.737(3)    |

|           |                                    |             |             |             |            |            |            |
|-----------|------------------------------------|-------------|-------------|-------------|------------|------------|------------|
| 180 K     | Rhombohedral                       | 13.87524(4) |             | 20.23232(9) |            |            |            |
| (10.30 %) | Rhombohedral<br>(Triclinic equiv.) | 10.47173(4) | 10.47173(4) | 10.47173(4) | 82.9831(3) | 82.9831(3) | 82.9831(3) |
| 165 K     | Rhombohedral                       | 13.87269(3) |             | 20.21765(8) |            |            |            |
| (9.73 %)  | Rhombohedral<br>(Triclinic equiv.) | 10.46745(3) | 10.46745(3) | 10.46745(3) | 83.0059(3) | 83.0059(3) | 83.0059(3) |

A plot of unit cell volume at different temperatures is given in Figure S2 and triclinic unit cell lengths and angles in Figures S3 and S4, respectively.

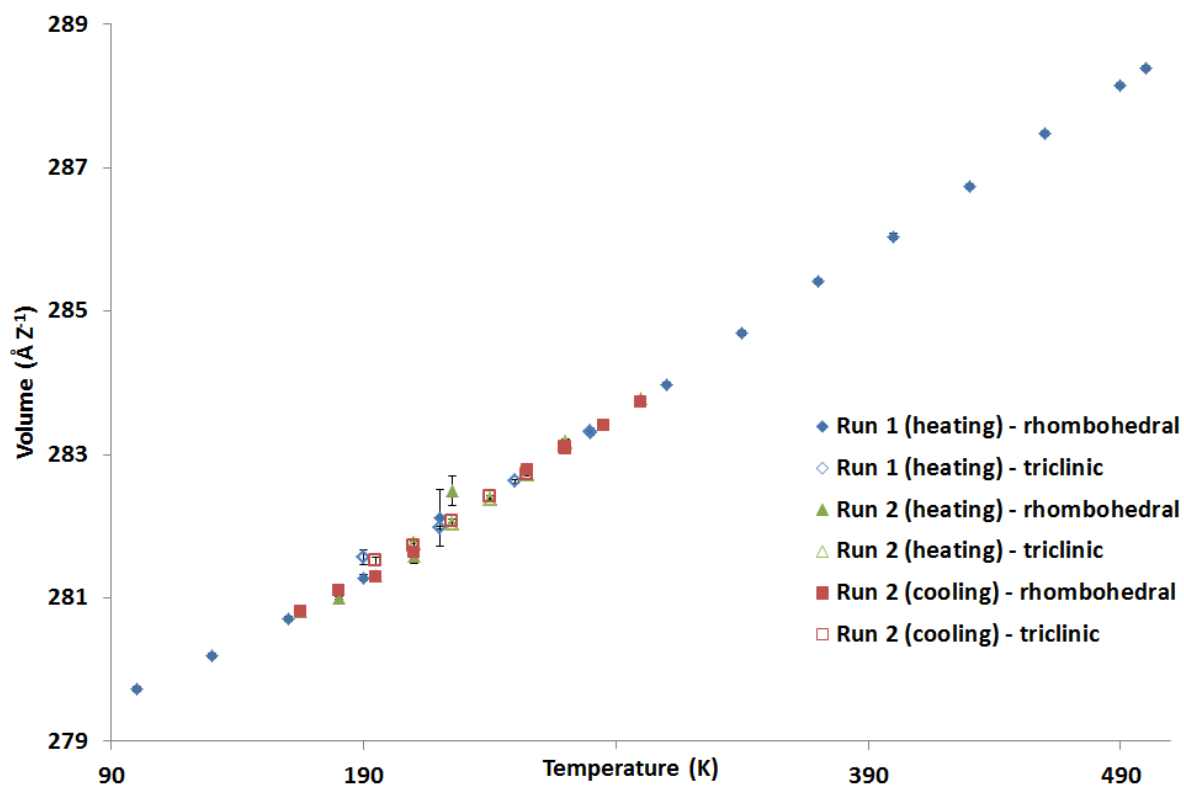

Figure S2: Unit cell volumes per formula unit for all three experiments

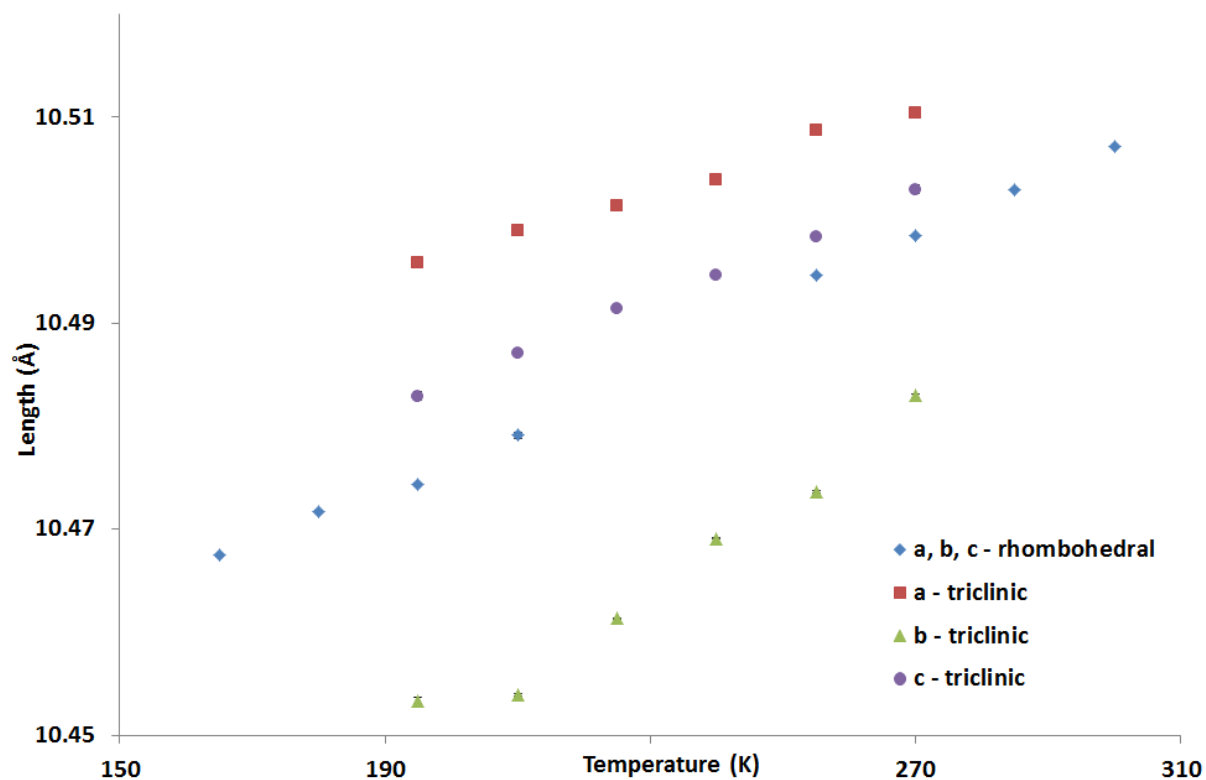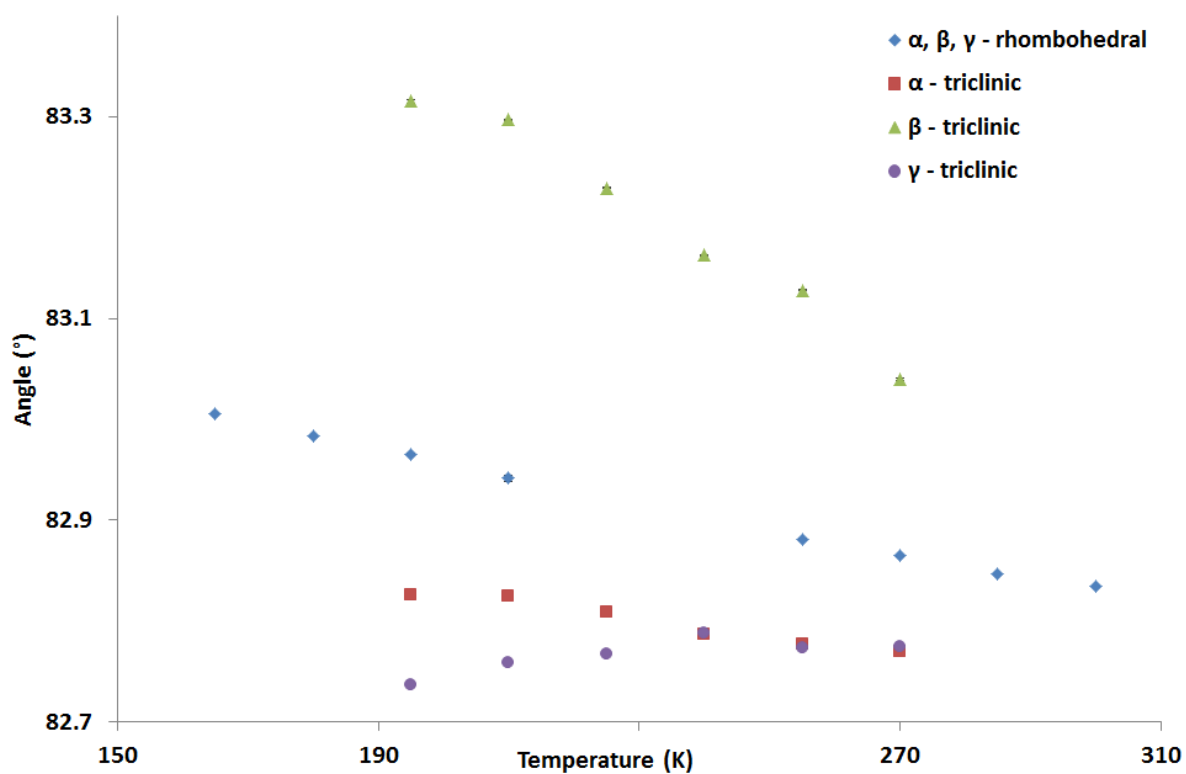

Figure S4: Triclinic unit cell angles for run 2 (cooling). The triclinic unit cell equivalent of the rhombohedral cell has been calculated ( $\alpha = \beta = \gamma$ ). Error bars are smaller than the data point size.

### Single Crystal Diffraction

All crystals produced were pale green and had a plate-like morphology. Single crystal diffraction was performed using an Agilent SuperNova diffractometer for the first experiment and a Bruker Apex-II diffractometer device for the second

experiment both using Mo  $K_{\alpha 1}$  radiation and the sample environment was controlled by an Oxford Cryosystems variable temperature. The data sets were analysed using the WinGX<sup>6</sup> package and SHELX<sup>7</sup>. Structure solution and refinement suggested a rhombohedral model analogous to that given in Table S2. CIF files for the single crystal refinements at 300 K, 245 K, 230 K, 220 K and 140 K are given as Supplementary.

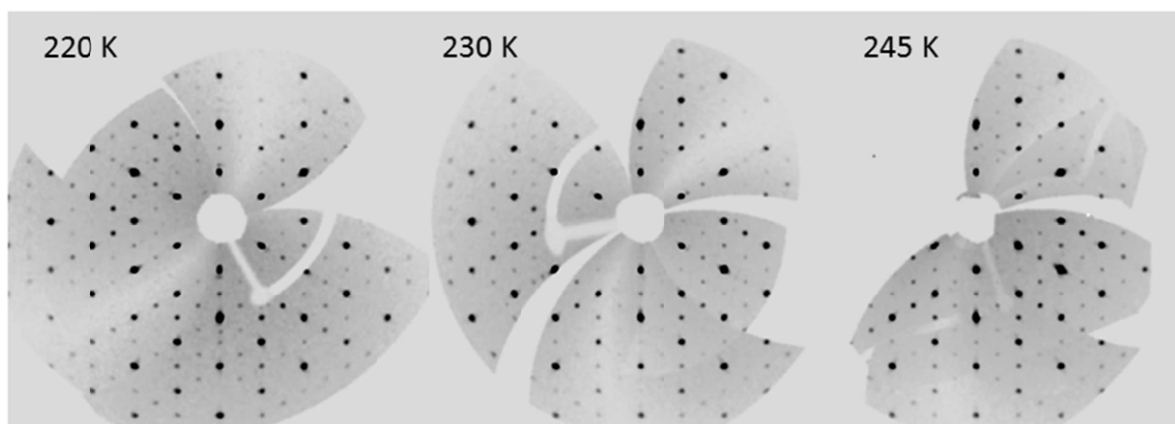

ention of 3-

### Neutron Powder Diffraction

Neutron powder diffraction was performed at ISIS Neutron and Muon Source, STFC, Rutherford Appleton Laboratory, Harwell Oxford, Didcot, OX11 0QX. The HRPD (High Resolution Powder Diffraction)<sup>8</sup> beamline was used with the sample (~5 g) held in flat plate geometry using a steel can with vanadium foil windows. Screws in the can were blanked with cadmium sheets. The sample holder was heated directly while using a cryostat within the sample station which was set to its lowest temperature achievable. For this reason the sample temperature was also measured directly at the sample. Measurements at a range of temperatures were taken but due to impurities it is difficult to extract the same detail that is present in the synchrotron X-ray data. We also find instrumental peaks in our data. An example of the data at room temperature is found in figure S6a and S6b.

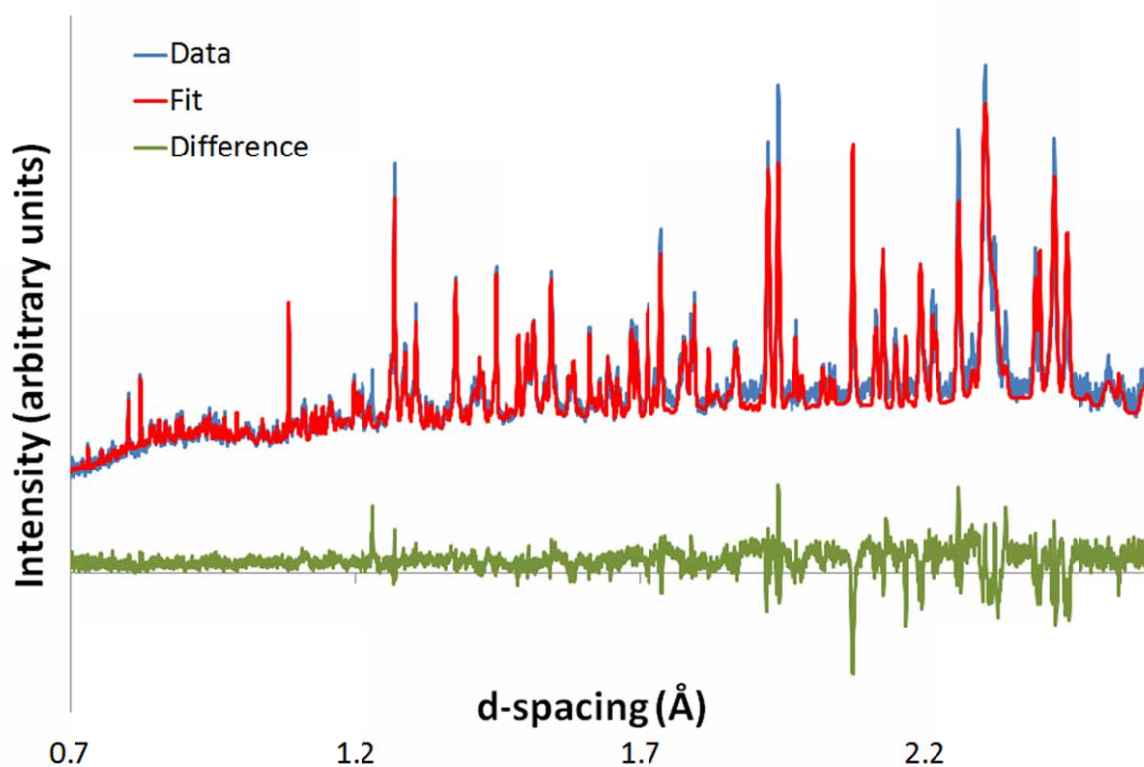



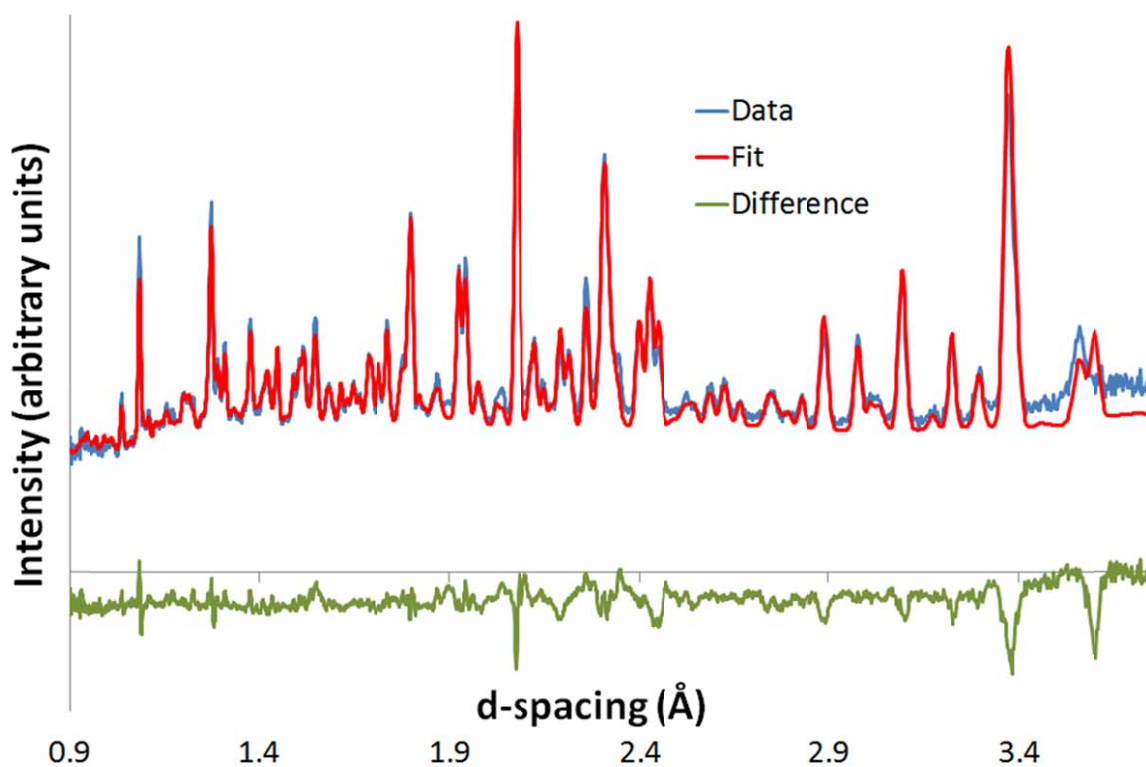

tion of the

Although the complexity of these patterns makes it difficult to ascertain the precise details of any phase transitions, there is an area where only the phase of interest is represented between  $d = 1.9$  and  $1.98$  Å (figure S7). This region clearly shows the appearance and disappearance of peak splitting with lowering of temperature, corresponding to the same conclusion discussed for the synchrotron experiment

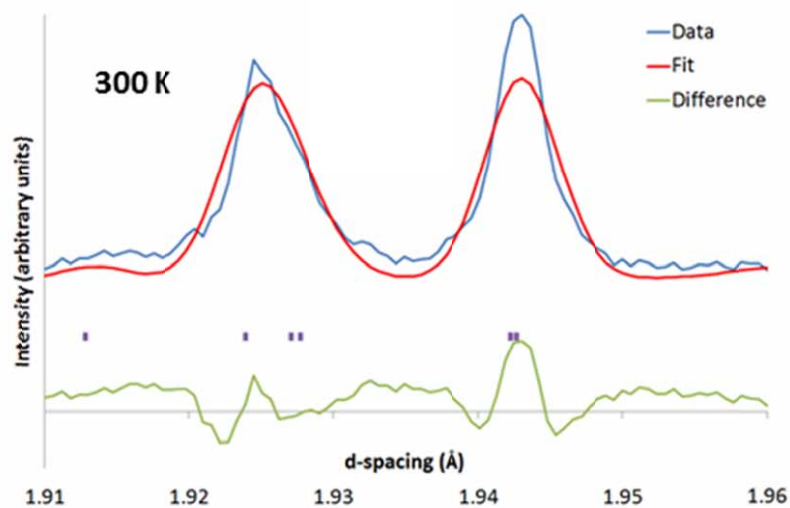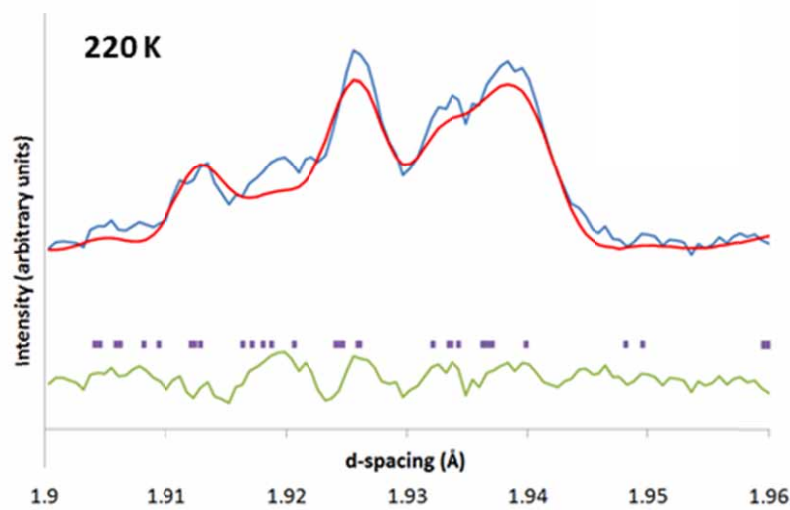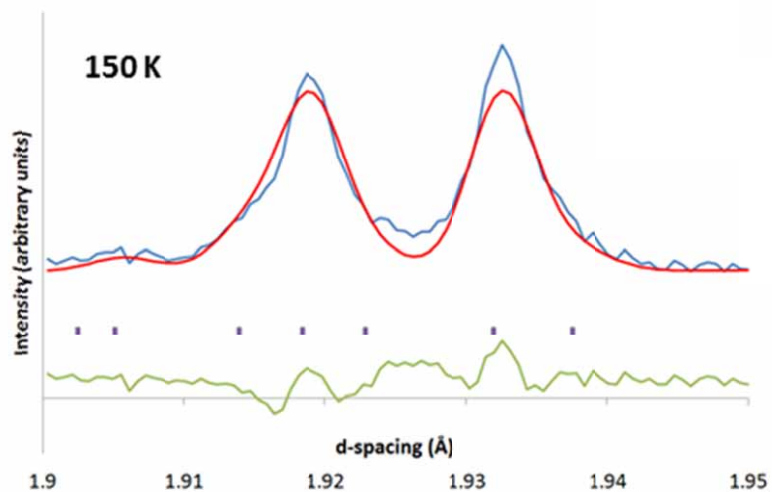

ere are no

- 1 S. P. Thompson, J. E. Parker, J. Potter, T. P. Hill, A. Birt, T. M. Cobb, F. Yuan, C. C. Tang, *Rev. Sci. Instrum.*, 2009, **80**, 075107.
- 2 B. J. Campbell, H. T. Stokes, D. E. Tanner, D. M. Hatch, *J. Appl. Cryst.*, 2006, **39**, 607.
- 3 K. Morita, M. Yano, T. Ono, H. Tanaka, K. Fujii, H. Uekusa, Y. Narumi, K. Kindo, *J. Phys. Soc. Jpn.*, 2008, **77**, 043707.
- 4 A. C. Larson, R.B. Von Dreele, *Los Alamos National Laboratory Report*, 1994, **LAUR 86-748**.
- 5 B. H. Toby, *J. Appl. Cryst.*, 2001, **34**, 210.
- 6 L. J. Farrugia, *J. Appl. Cryst.*, 1999, **32**, 837.
- 7 G. M. Sheldrick, *Acta Cryst.*, 2008, **A64**, 112.
- 8 M. W. Johnson, W. I. F. David, *Rutherford Appleton Laboratory Report*, 1985, **RAL-85-112**.
